# Supplementary material for: SAMHD1 enhances nucleoside-analogue efficacy against HIV-1 in myeloid cells
Source: PubMed Central journal article supplement (PMC5318888; doi:10.1038/srep42824), 2017-02-21
Supplement: srep42824-s1.pdf [file srep42824-s1.pdf]

## **Supplementary Material**

SAMHD1 enhances nucleoside-analogue efficacy against HIV-1 in myeloid cells

Paula Ordonez, Simone Kunzelmann, Harriet C. Groom, Melvyn W. Yap, Simon Weising,  
Chris. Meier, Kate N. Bishop, Ian A. Taylor and Jonathan P. Stoye

**Table S1. Cytotoxicity and anti-HIV-1 activity of nucleoside analogues in T cell lines**

| Nucleoside analogue | H9                                                                |                                                      |                 | Jurkat                                  |                                         |        |
|---------------------|-------------------------------------------------------------------|------------------------------------------------------|-----------------|-----------------------------------------|-----------------------------------------|--------|
|                     | CC <sub>50</sub> ( $\mu$ M) <sup>a</sup><br>[95% CI] <sup>c</sup> | EC <sub>50</sub> ( $\mu$ M) <sup>b</sup><br>[95% CI] | SI <sup>d</sup> | CC <sub>50</sub> ( $\mu$ M)<br>[95% CI] | EC <sub>50</sub> ( $\mu$ M)<br>[95% CI] | SI     |
| ACV                 | >200                                                              | >200                                                 | -               | >200                                    | >200                                    | -      |
| GCV                 | >200                                                              | >200                                                 | -               | >200                                    | >200                                    | -      |
| CFB                 | 0.031<br>[0.026 - 0.037]                                          | 0.094<br>[0.028 - 0.159]                             | <1              | 0.049<br>[0.025 - 0.073]                | 0.663<br>[0.436 - 0.891]                | <1     |
| d4T                 | >200                                                              | 5.57<br>[5.33 - 5.82]                                | >36             | >200                                    | 6.56<br>[1.38 - 11.7]                   | >30    |
| ddI                 | >200                                                              | 2.37<br>[0.803 - 3.94]                               | >84             | >200                                    | 1.43<br>[0.711 - 2.15]                  | >140   |
| ABC                 | >200                                                              | 0.029<br>[0.022 - 0.036]                             | >6897           | >200                                    | 0.026<br>[0.007 - 0.044]                | >7692  |
| NVP                 | >200                                                              | 0.158<br>[0.116 - 0.201]                             | >1266           | >200                                    | 0.486<br>[0.345 - 0.627]                | >412   |
| RAL                 | >200                                                              | 0.002<br>[0.002 - 0.003]                             | >100000         | >200                                    | 0.004<br>[0.003 - 0.004]                | >50000 |

<sup>a</sup>CC<sub>50</sub> is the effective concentration that inhibits cell viability by 50% measured as the percentage of live cells by flow cytometry. Values were calculated by non-linear regression for at least two independent experiments.

<sup>b</sup>EC<sub>50</sub> is the effective concentration of drug that inhibits infection of cells by 50% measured as percentage of GFP<sup>+</sup> cells. Values were calculated by non-linear regression for at least two independent experiments.

<sup>c</sup>95% confidence interval. Non-ambiguous values were subject to a replicate test.

<sup>d</sup>SI: Selectivity index, CC<sub>50</sub>/EC<sub>50</sub>

**Table S2. Cytotoxicity and selectivity index of nucleoside analogues in monocytoid cell lines**

| Nucleoside analogue | U937                                                              |                 |                                         |       | THP-1                                   |       |                                         |       |
|---------------------|-------------------------------------------------------------------|-----------------|-----------------------------------------|-------|-----------------------------------------|-------|-----------------------------------------|-------|
|                     | PMA <sup>-</sup>                                                  |                 | PMA <sup>+</sup>                        |       | PMA <sup>-</sup>                        |       | PMA <sup>+</sup>                        |       |
|                     | CC <sub>50</sub> ( $\mu$ M) <sup>a</sup><br>[95% CI] <sup>b</sup> | SI <sup>c</sup> | CC <sub>50</sub> ( $\mu$ M)<br>[95% CI] | SI    | CC <sub>50</sub> ( $\mu$ M)<br>[95% CI] | SI    | CC <sub>50</sub> ( $\mu$ M)<br>[95% CI] | SI    |
| ACV                 | >200                                                              | -               | >200                                    | >4    | >200                                    | -     | >200                                    | >304  |
| GCV                 | >200                                                              | -               | >200                                    | -     | >200                                    | -     | >200                                    | >545  |
| CFB                 | 0.090<br>[0.080 - 0.100]                                          | <1              | >1.6                                    | >43   | 0.059<br>[0.023 - 0.095]                | <1    | >1.6                                    | >533  |
| d4T                 | >200                                                              | >31             | >200                                    | >28   | >200                                    | >32   | >200                                    | >51   |
| ddl                 | >200                                                              | >4              | >200                                    | >82   | >200                                    | >99   | >200                                    | >2151 |
| ABC                 | > 200                                                             | >14             | >200                                    | >27   | >200                                    | >406  | >200                                    | >6452 |
| NVP                 | >200                                                              | >396            | >200                                    | >1695 | >200                                    | >542  | >200                                    | >913  |
| RAL                 | >200                                                              | >15385          | >200                                    | >3175 | >200                                    | >4545 | >200                                    | >5405 |

<sup>a</sup>CC<sub>50</sub> is the effective concentration of nucleoside analogue that inhibits cell viability by 50% measured as the percentage of live cells by flow cytometry. Values were calculated by non-linear regression from at least two independent experiments.

<sup>b</sup>95% confidence interval. Non-ambiguous values were subject to a replicate test.

<sup>c</sup>SI: Selectivity index, CC<sub>50</sub>/EC<sub>50</sub>
